# Supplementary material
Source: PubMed Central journal article supplement (PMC4758112)
Supplement: NIHMS758546-supplement-Fig__S1.pdf [file NIHMS758546-supplement-Fig__S1.pdf]

## Choice Behavior Across Groups

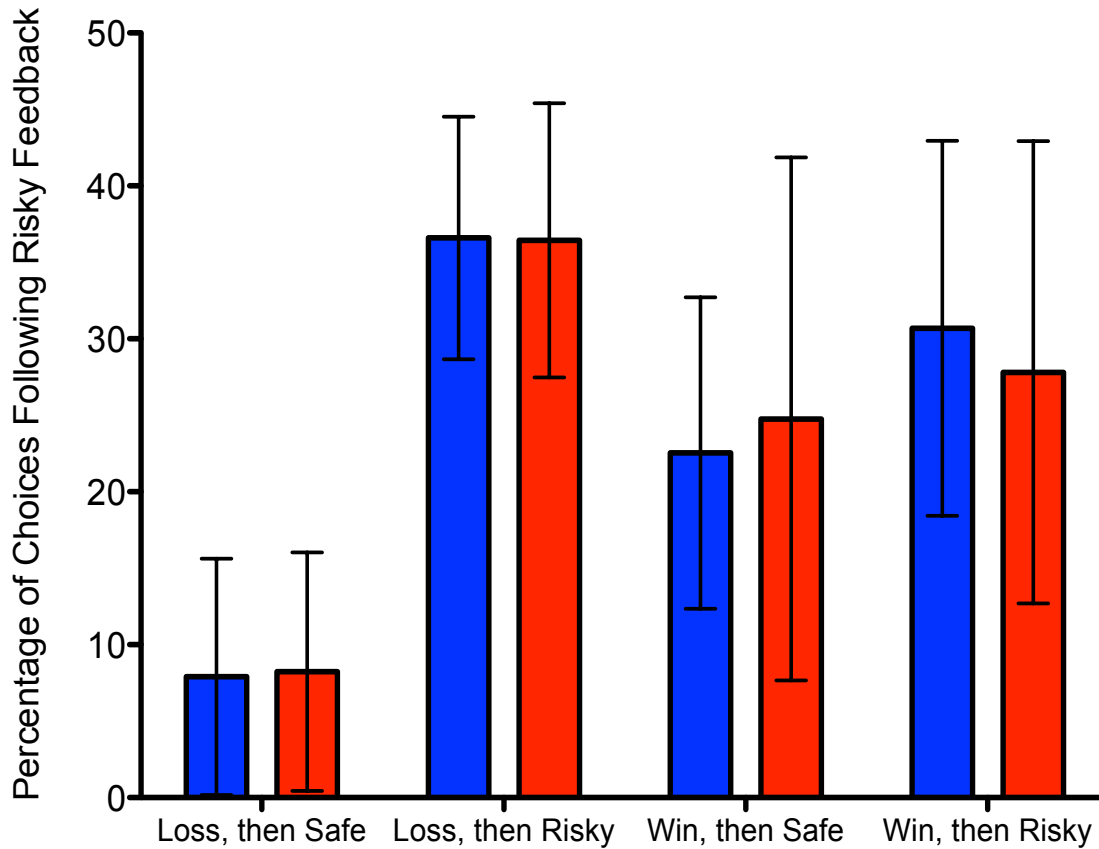

Figure S1. After a loss, both groups were significantly more likely to make a risky than a safe choice ( $F = 46.97$ ,  $P < 0.0001$  across all participants). After a win, both groups were equally likely to make a risky or a safe choice
